# Supplementary material
Source: PubMed Central journal article supplement (PMC3009906)
Supplement: supp_M110.140889_jbc.M110.140889-1.pdf [file supp_M110.140889_jbc.M110.140889-1.pdf]

**SUPPLEMENTAL TABLE I**

|    | Molecule                   | Vector                  | Sense/<br>Antisense | Sequence 5' 3'                    | Cloning sites  | Template                          | Reference |
|----|----------------------------|-------------------------|---------------------|-----------------------------------|----------------|-----------------------------------|-----------|
| 1  | CD300c FL                  | pCDNA3.1/V5-His<br>TOPO | Sense               | TGCTGGGAGGAGACTACA                | -              | Human spleen cDNA library         | -         |
| 2  |                            |                         | Antisense           | GGAGGCTCACAAAGGATT                | -              |                                   |           |
| 3  | CD300c WT                  | pDisplay                | Sense               | CCTAGATCTACCGTGGCGGGCCCGTGGGG     | BglIII         | pCDNA3.1-CD300c FL                | -         |
| 4  |                            |                         | Antisense           | GCCGTCGACCTACTGGTTCTCACCCCTGGG    | Sall           |                                   |           |
| 5  | CD300c E191V               | pDisplay                | Sense               | CTCCTGGTCCTTGGTGTGCCCTGCTCCTG     | -              | pDisplay-CD300c WT                | -         |
| 6  |                            |                         | Antisense           | CAGGAGCAGGGGAGACCAAGAGGACCAG      | -              |                                   |           |
| 7  | CD300c Δcyto               | pDisplay                | Sense               | Oligo 3                           | BglIII         | pDisplay-CD300c WT                | -         |
| 8  |                            |                         | Antisense           | GCCGTCGACCTAAGGTCTGTTACCCCA       | Sall           |                                   |           |
| 9  | CD300c Δlg                 | pDisplay                | Sense               | CCTAGATCTCCGGCCGGGACGACCACA       | BglIII         | pDisplay-CD300c WT                | -         |
| 10 |                            |                         | Antisense           | Oligo 4                           | Sall           |                                   |           |
| 11 | CD300c WT                  | pBabePuro-2×Myc         | Sense               | CTGGAATTCACCGTGGCGGGCCCGTGG       | EcoRI          | pDisplay-CD300c WT                | -         |
| 12 | CD300c E191V               |                         | Antisense           | Oligo 4                           | Sall           | pDisplay-CD300c E191V             | -         |
| 13 | CD300c Δcyto               | pBabePuro-2×Myc         | Sense               | Oligo 11                          | EcoRI          | pDisplay-CD300c Δcyto             | -         |
| 14 |                            |                         | Antisense           | Oligo 8                           | Sall           |                                   |           |
| 15 | CD300c WT                  | pCDNA3-FLAG             | Sense               | CTGGAATTCGGACCGTGGCGGGCCCGTGG     | EcoRI          | pDisplay-CD300c WT                | -         |
| 16 |                            |                         | Antisense           | CTGCTCGAGCTACTGGTTCTCACCCCT       | XhoI           |                                   |           |
| 17 | HA-CD300c (Soluble)        | pEXP5-CT-TOPO           | Sense               | ATGGGTGCGTATCCATATGATGTTCCAGAT    | -              | pDisplay-CD300c WT                | -         |
| 18 |                            |                         | Antisense           | CGCTAGCGGACATTGCTGAACAGGGA        | -              |                                   |           |
| 19 | CD300b WT                  | pCDNA3-FLAG             | Sense               | CTGGGATCCCAAGGCCAGAGTCTGTG        | BamHI          | pDisplay-CD300b WT                | (19)      |
| 20 | CD300b K158L               |                         | Antisense           | CTGGAATTCCTAAGTGCCATGTCTTT        | EcoRI          |                                   |           |
| 21 | CD300b ΔCyto               | pCDNA3-FLAG             | Sense               | Oligo 19                          | BamHI          | pDisplay-CD300b Δl                | (19)      |
| 22 |                            |                         | Antisense           | GCCGTCGACCTACCTCTGAGACCCCTCAA     | Sall (XhoI)    |                                   |           |
| 23 | CD300b C50G                | pCDNA3-FLAG             | Sense               | CATT AAGTGGTGGGCGGAGGGGTGCG       | -              | pCDNA3-FLAG-CD300b WT             | -         |
| 24 |                            |                         | Antisense           | CGCACCCCTCGGCCACCACCTAATG         | -              |                                   |           |
| 25 | CD300b W103G               | pCDNA3-FLAG             | Sense               | CGCAGATGTTACGGGTGTGGGATTGAAAG     | -              | pCDNA3-FLAG-CD300b WT             | -         |
| 26 |                            |                         | Antisense           | CTTCAATCCACACCCGTAACATCTGCG       | -              |                                   |           |
| 27 | CD300b W55,103G            | pCDNA3-FLAG             | Sense               | CCGAGGGGTGCGCGGGATACATGCAAGAT     | -              | pCDNA3-FLAG-CD300b W103G          | -         |
| 28 |                            |                         | Antisense           | ATCTTGCATGTATCCCGGCACCCCTCGG      | -              |                                   |           |
| 29 | CD300b W55,103G-D112M      | pCDNA3-FLAG             | Sense               | AAGAAGAGGACCTATGCTTGGGACTCAAGT    | -              | pCDNA3-FLAG-CD300b W55,103G       | -         |
| 30 |                            |                         | Antisense           | ACTTGAGTCCCAAGCATAGGTCCTCTCT      | -              |                                   |           |
| 31 | CD300b W55,103G-Q63S-D112M | pCDNA3-FLAG             | Sense               | CAAGATCCTCATTCAACCAGAGGGTCCGA     | -              | pCDNA3-FLAG-CD300b W55,103G-D112M | -         |
| 32 |                            |                         | Antisense           | TCCGACCCCTCTGGTTGAAATGAGGATCTTG   | -              |                                   |           |
| 33 | CD300b Δlg                 | pCDNA3-FLAG<br>pDisplay | Sense               | CTGGGATCCCAAGGGAGCGGCTTCC         | BamHI (BglIII) | pDisplay-CD300b WT                | (19)      |
| 34 |                            |                         | Antisense           | Oligo 20                          | EcoRI          |                                   |           |
| 35 | FLAG-CD300b (Soluble)      | pEXP5-CT-TOPO           | Sense               | ATGGGTGCGGATTACAAGGACGATGACGAC    | -              | pCDNA3-FLAG-CD300b WT             | -         |
| 36 |                            |                         | Antisense           | CGCTAGTAGTGGTCTCTTGTGGGA          | -              |                                   |           |
| 37 | CD300e WT                  | pCDNA3-FLAG             | Sense               | CCTGAATCTTTCAGGCTGTTGTCTCTG       | EcoRI          | pDisplay-CD300e WT                | (20)      |
| 38 |                            |                         | Antisense           | GGAATCGAGCTATCTCCAGGAGGAGC        | XhoI           |                                   |           |
| 39 | CD300f WT                  | pCDNA3-FLAG             | Sense               | CCTAGATCTGGCTACTCCATTGCCACTCAA    | BglIII (BamHI) | pDisplay-CD300f WT                | (18)      |
| 40 |                            |                         | Antisense           | GCCGTCGACCTAAGGCCTGTGATGGTGTGATTC | Sall (XhoI)    |                                   |           |
| 41 | CD300f WT                  | pBabePuro-2×Myc         | Sense               | GCCGAATTCGGCTACTCCATTGCCACTCAA    | EcoRI          | pDisplay-CD300f WT                | (18)      |
| 42 |                            |                         | Antisense           | Oligo 40                          | Sall           |                                   |           |
| 43 | HA-CD300f (Soluble)        | pEXP5-CT-TOPO           | Sense               | Oligo 17                          | -              | pDisplay-CD300f WT                | (18)      |
| 44 |                            |                         | Antisense           | CGCTAACTGAGCTTCAAGAGCTTGTG        | -              |                                   |           |
| 45 | Rat CD300b FL              | pCDNA3.1/V5-His<br>TOPO | Sense               | AAGAGGTGCAGAGTGGGAAG              | -              | PBMC cDNA                         | -         |
| 46 |                            |                         | Antisense           | AGGGAAGGCTCTGCTTATCC              | -              |                                   |           |
| 47 | Rat CD300b WT              | pDisplay                | Sense               | CCTAGATCTCAAGGCCAGAATTGGTGAGG     | BglIII         | pCDNA3.1-Rat CD300b FL            | -         |
| 48 |                            |                         | Antisense           | GCCGTCGAGCTAAGGAGAAATGTCTTAGC     | PstI           |                                   |           |
| 49 | CD300a FL                  | pCDNA3.1/V5-His<br>TOPO | Sense               | GCACCAAGAAAAGCAGAA                | -              | PHA-activated PBMC cDNA library   | -         |
| 50 |                            |                         | Antisense           | GGCAGGACAAAAGCCTAT                | -              |                                   |           |
| 51 | CD300a WT                  | pDisplay<br>pCDNA3-FLAG | Sense               | CCTAGATCTAGCAAATGCAGGACCGTGGCG    | BglIII (BamHI) | pCDNA3.1-CD300a FL                | -         |
| 52 |                            |                         | Antisense           | GCCGTCGACCTATGTTCTTCTATCACACT     | Sall (XhoI)    |                                   |           |
| 53 | TREM1 FL                   | pCDNA3.1/V5-His<br>TOPO | Sense               | GCTGGTGCACAGGAAGGATG              | -              | Purified human monocytes cDNA     | -         |
| 54 |                            |                         | Antisense           | GGCTGGAAGTCAGAGGACATT             | -              |                                   |           |
| 55 | TREM1 WT                   | pCDNA3-FLAG             | Sense               | CCTAGATCTGCACCTAAATTAACCTGAG      | BglIII         | pCDNA3.1-TREM1 FL                 | -         |
| 56 |                            |                         | Antisense           | GCCGTCGACCTAGGGTACAATGACCT        | Sall           |                                   |           |
| 57 | FLAG-TREM1 (Soluble)       | pEXP5-CT-TOPO           | Sense               | Oligo 35                          | -              | pCDNA3-FLAG-TREM1 WT              | -         |
| 58 |                            |                         | Antisense           | CGCTACCTGATGATATCTGTACATT         | -              |                                   |           |

|    |                  |                      |           |                                                                   |               |                   |      |
|----|------------------|----------------------|-----------|-------------------------------------------------------------------|---------------|-------------------|------|
| 59 | CD28 Full Length | pCDNA3.1/V5-His TOPO | Sense     | TTCAGTCCCCTCACACTTCGGGT                                           | -             | PBMC cDNA         | -    |
| 60 |                  |                      | Antisense | TGGCGGTCATTTCTATCCAGAGC                                           | -             |                   |      |
| 61 | CD28 WT          | pcDNA3-FLAG          | Sense     | <u>CCTAGATCTATTTGGTGAAGCAGTCG</u>                                 | <u>BglIII</u> | pCDNA3.1-CD28 FL  | -    |
| 62 |                  |                      | Antisense | <u>GCCGTCGACTCAGGAGCGATAGGCTGC</u>                                | <u>Sall</u>   |                   |      |
| 63 | FceRγ            | pcDNA3-FLAG          | Sense     | <u>CTGGGATCCGGAGAGCCTCAGCTCTGC</u>                                | <u>BamHI</u>  | pFLAG-CMV2- FceRγ | (20) |
| 64 |                  |                      | Antisense | <u>GCCGAATTCCTACTGTGGTGGTTTCTC</u>                                | <u>EcoRI</u>  |                   |      |
| 65 | siRNA FceRγ 1    | pSilencer2.1-U6Hygro | Sense     | GATCCGATCCAGGTCGAAAGGCATTCAAGAGATGC<br>CTTCCGACCTGGATCTTTTTGGAAA  | -             | -                 | -    |
| 66 |                  |                      | Antisense | AGCTTTTCCAAAAAGATCCAGGTCCGAAAGGCATCT<br>CTTGAATGCCTTCCGACCTGGATCG | -             | -                 | -    |
| 67 | siRNA FceRγ 4    | pSilencer2.1-U6Hygro | Sense     | GATCCACATGAGAAACCACCCAATTCAAGAGATTG<br>GGGTGGTTTCTCATGTTTTTGGAAA  | -             | -                 | -    |
| 68 |                  |                      | Antisense | AGCTTTTCCAAAAAACATGAGAAACCACCCAATCT<br>CTTGAATTGGGTGGTTTCTCATGIG  | -             | -                 | -    |

**Table 1: Constructions used in this study.** Oligonucleotides used for product amplification and templates are listed. Nucleotide changes introduced in the sequence for amino acid substitution are shown in bold letters. Restriction sites used for cloning are underlined. Compatible restriction sites in the vector when used are in parenthesis.

## SUPPLEMENTAL FIGURES

**Figure 1**

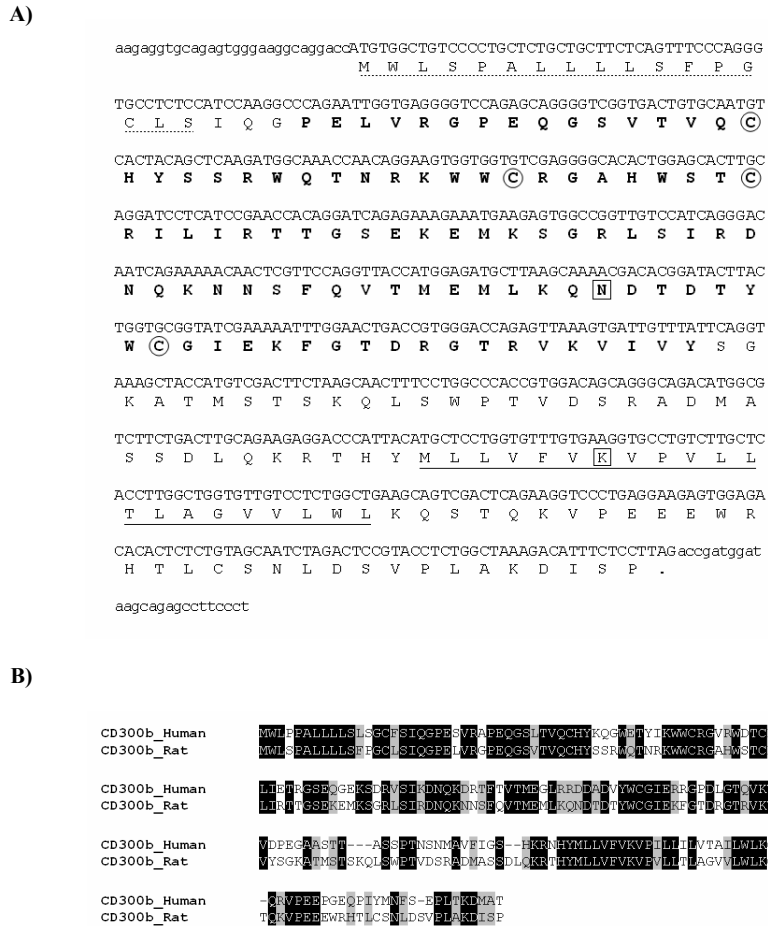

**Supplemental Figure 1. A) Nucleotide and predicted amino acid sequence of rat CD300b (GU054494).** The nucleotide sequence of rat CD300b containing an open reading frame of 627 bp is shown in upper case. The 5' and 3' untranslated regions are shown in lower case. The predicted amino acid sequence is shown below the nucleotide sequence. The signal peptide is underlined (dotted line). The Ig-like domain is marked in bold and the transmembrane domain is underlined (single line). Cysteine residues involved in the Ig-like domain fold are circled. N-glycosylation sites in the Ig-fold and the charged lysine in the transmembrane domain are boxed. **B) Sequence alignment of CD300b with its rat ortholog.** The entire molecule is represented. Identical amino acids and conservative changes are shown on black and grey backgrounds respectively.

**Figure 2**

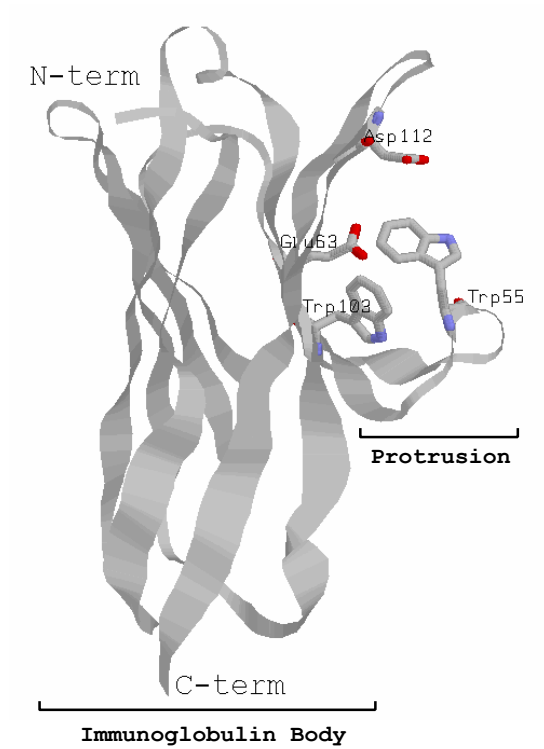

**Supplemental Figure 2. CD300b immunoglobulin domain structure.** A structural model of CD300b Ig domain was obtained using CD300f and CLM-1 molecules as template. Strand representation. Crystallized members of CD300 family have shown that the V-set Ig fold is composed by a main immunoglobulin body and a prominent protrusion extending from it. Location and orientation of the side-chains of several amino acids in the protrusion are represented.

Figure 3

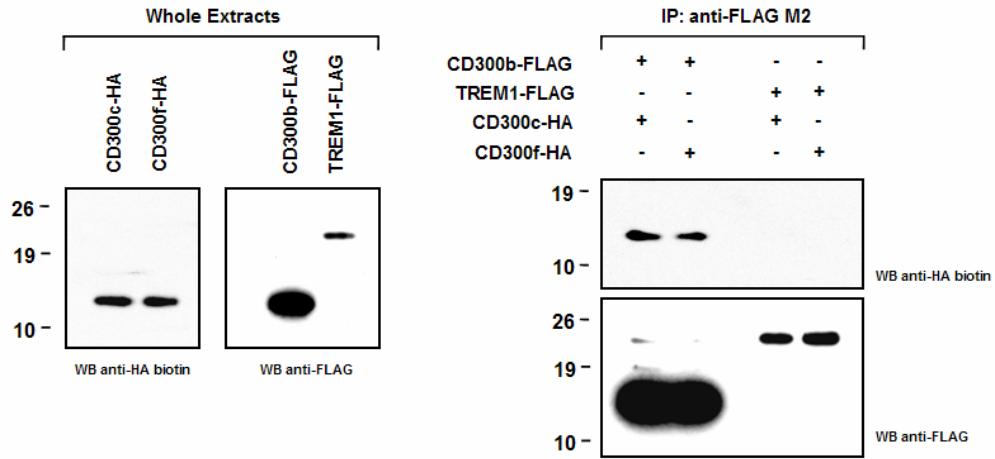

**Supplemental Figure 3.** *In vitro* produced tagged-receptors were tested by WB techniques (left panel). Co-immunoprecipitation of *in vitro* translated receptors was assessed as described before (right panel).
